# Supplementary material for: Molecular profiling of radical prostatectomy tissue from patients with no sign of progression identifies ERG as the strongest independent predictor of recurrence
Source: PubMed Central journal article supplement (PMC6849651; doi:10.18632/oncotarget.27294), 2019-11-05
Supplement: oncotarget-10-6466-s001.pdf [file oncotarget-10-6466-s001.pdf]

## Molecular profiling of radical prostatectomy tissue from patients with no sign of progression identifies *ERG* as the strongest independent predictor of recurrence

### SUPPLEMENTARY MATERIALS

#### Isolation and quality control of RNA from prostatectomy specimens

To achieve the desired RNA yield and quality, we optimized tissue section storage and RNA isolation steps (Supplementary Figure 1). We noted RNA isolated from tissues sections that were freshly cut from archived FFPE blocks was better preserved than RNA isolated from FFPE sections and stored for a week at  $-80^{\circ}\text{C}$  (Supplementary Figure 2A). Shorter Proteinase K digestion at  $56^{\circ}\text{C}$  resulted in less RNA fragmentation (Supplementary Figure 2B). Based on these results, we conducted a pilot study using five FFPE prostate cancer specimens using freshly cut tissue sections and 30 minutes of Proteinase K digestion to verify if optimal RNA yield could be achieved. The results showed that the RNA yield from modified manual microdissection and from scraping were comparable (Supplementary Figure 2C). RNA isolated

from benign epithelium by LCM were more fragmented likely due to the prolonged dissection at room temperature. We obtained approximately 500 ng of total RNA from about  $0.6\text{ cm}^2$  of tumor area of a  $7\text{ }\mu\text{m}$  FFPE tissue section and detected 93% target genes. As a quality control, we checked readout of the prostate epithelium specific genes by NanoString. Both tumor and normal cells from RP specimens showed comparable levels of expression of prostate epithelial marker genes such as *KLK3*, *MSMB* (Microseminoprotein Beta) and *ACPP* (Prostatic Acid Phosphatase) (Supplementary Figure 1C). Likewise, prostate cancer genes such as *PSGR*, *AMACR* and *PCA3* were up-regulated in tumor samples. Taken together, the results indicated that our manual microdissection method, improved by incorporating a membrane-frame slide, enabled the molecular profiling of archived FFPE specimen by NanoString.

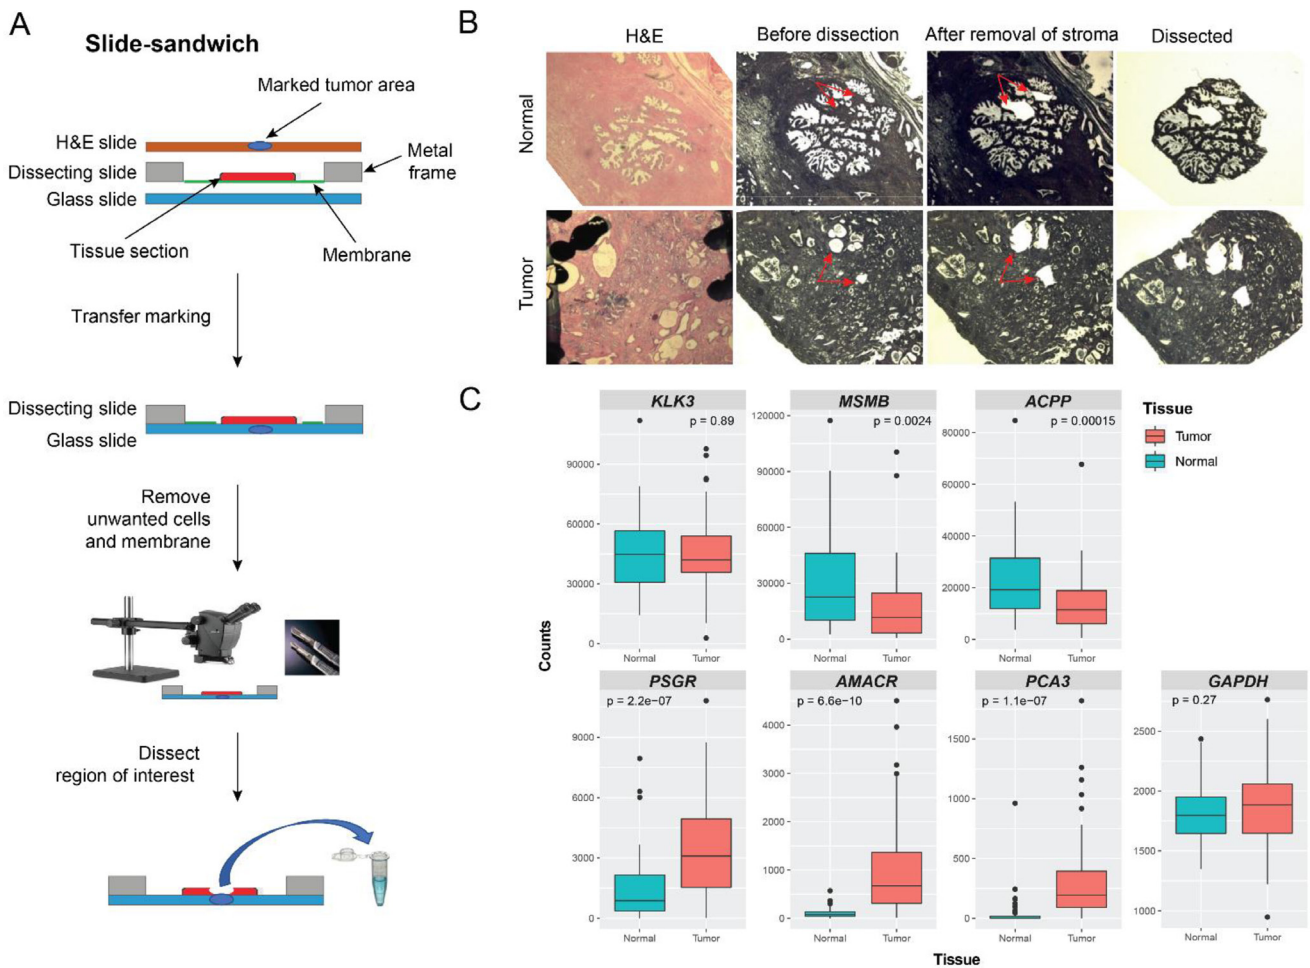

**Supplementary Figure 1: Experimental workflow for the manual microdissection of tumor and normal cells from prostatectomy specimens.** (A) Schematic representation of the steps involved in the membrane-frame slide based manual microdissection. A “slide-sandwich” was made by placing the H&E “guide-slide” on the “well” side of the dissection membrane slide, and a clean glass slide below to provide support. After matching the tissue outline between the dissection and guide slides, the markings of tumor area labeled by the pathologist in the top H&E “guide-slide” were transferred to the support glass slide; (B) Under a stereo microscope, unwanted cells within the marked area were first excised using a scalpel blade along with the underneath membrane. The selected areas were then manually dissected and collected in labeled microcentrifuge tubes for RNA extraction; (C) Expression of prostate epithelial genes (*KLK3*, *MSMB* and *ACPP*), prostate cancer specific genes (*PSGR*, *AMACR* and *PCA3*), and control *GAPDH* gene. T, tumor; N, matched benign epithelium.

## A Comparison between freshly cut FFPE sections and storage at -80°C on RNA yield

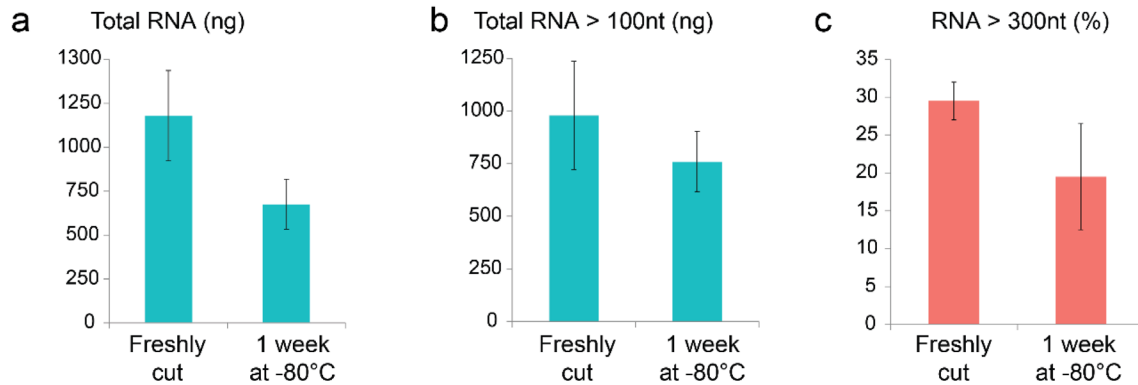

## B Effect of duration of Proteinase K digestion on RNA yield

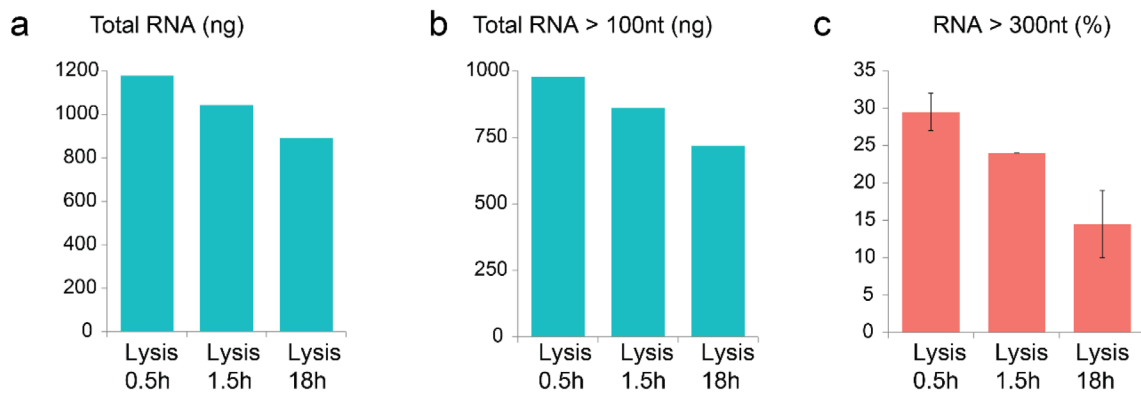

## C Comparison of cellular isolation methods on RNA yield and quality

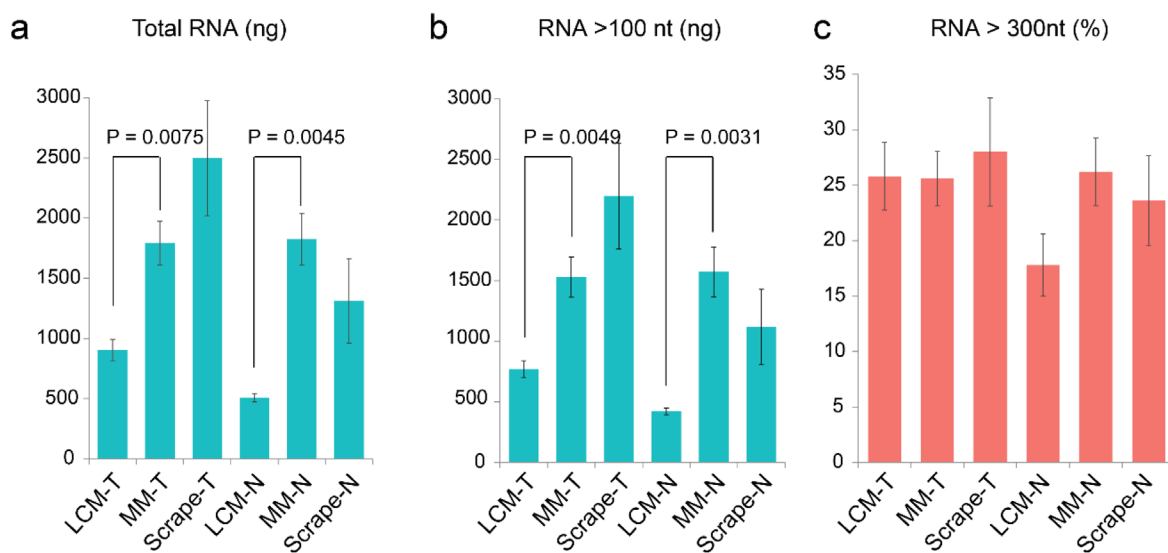

**Supplementary Figure 2:** (A) Comparison between freshly cut FFPE tissue specimens and storage of cut sections for a week at -80°C on yield and quality of total RNA (Aa), RNA > 100 nt (Ab) and RNA > 300 nt (Ac). (B) Effect of lysis conditions on the yield and quality of total RNA (Ba), RNA > 100 nt (Bb) and RNA > 300 nt (Bc). (C) Comparison of LCM, manual microdissection (MM) and scraping (Scrape) methods on the yield and quality of total RNA (Ca), RNA > 100 nt (Cb) and RNA > 300 nt (Cc) isolated from tumor and normal FFPE tissue specimen.

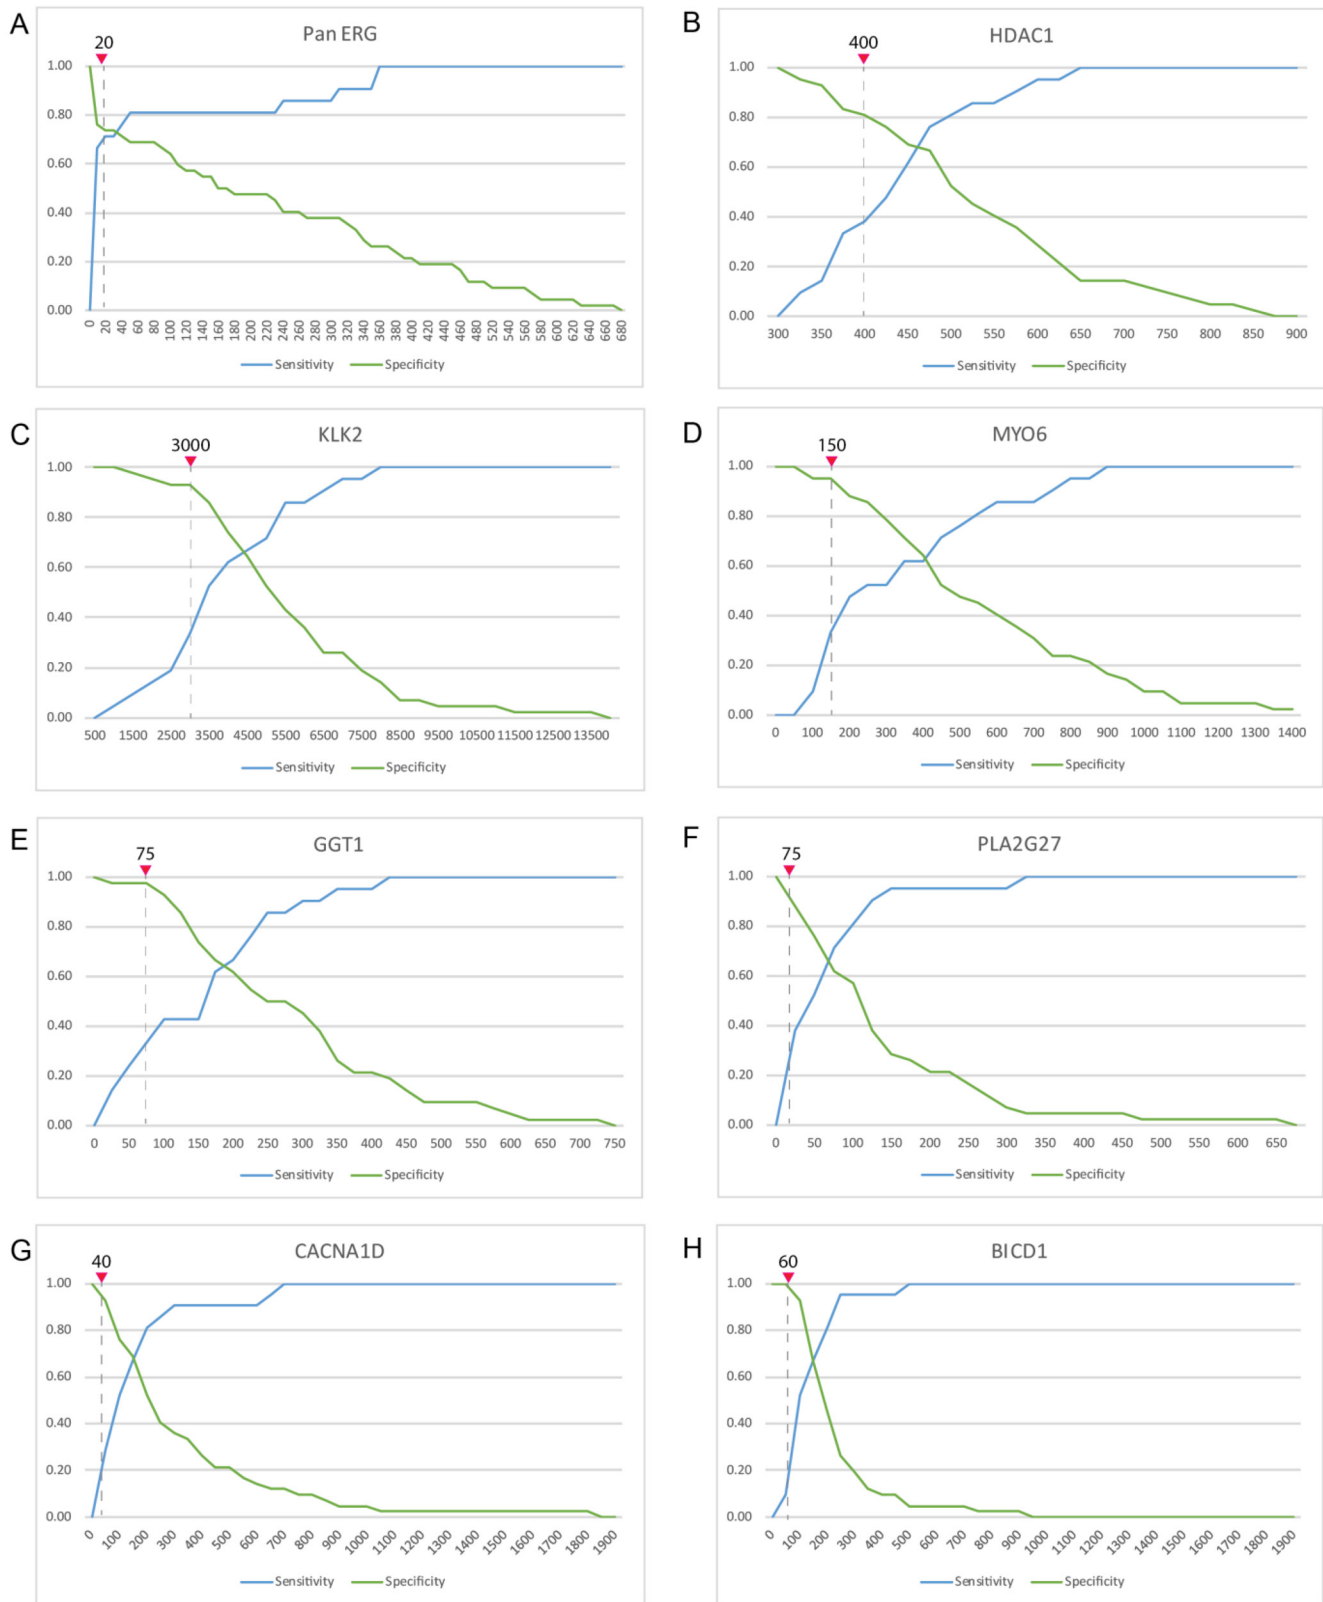

**Supplementary Figure 3: Plot of the sensitivity and specificity of genes based on their range of transcript count detected by NanoString nCounter.** Sensitivity and specificity plots for Pan-ERG (A), HDAC1 (B), KLK2 (C), MYO6 (D), GGT1 (E), PLA2G27 (F), CACNA1D (G), and BICD1 (H), showing the cut-off value for each gene that was selected to prioritize specificity over sensitivity.

**Supplementary Table 1: BioAnalyzer analysis of RNA samples prepared for NanoString from micro-dissected index tumor and benign epithelium cells, assessed for percentage of RNA >100 and >300 nucleotides**

| Case no. | Cell population | >100 nt (%) | >300 nt (%) | RIN (%) | Cell population | >100 nt (%) | >300 nt (%) | RIN (%) | BCR status |
|----------|-----------------|-------------|-------------|---------|-----------------|-------------|-------------|---------|------------|
| 1        | Tumor           | 86          | 26          | 2.3     | Normal          | 85          | 28          | 2.2     | BCR        |
| 2        | Tumor           | 83          | 20          | 2.3     | Normal          | 85          | 31          | 2.3     | Non-BCR    |
| 3        | Tumor           | 76          | 14          | 2.4     | Normal          | 67          | 6           | 2.6     | Non-BCR    |
| 4        | Tumor           | 83          | 20          | 2.3     | Normal          | 85          | 22          | 2.3     | BCR        |
| 5        | Tumor           | 86          | 27          | 2.3     | Normal          | 87          | 28          | 2.3     | Non-BCR    |
| 6        | Tumor           | 85          | 21          | 2.3     | Normal          | 85          | 24          | 2.3     | Non-BCR    |
| 7        | Tumor           | 84          | 27          | 2.3     | Normal          | 81          | 22          | 2.3     | BCR        |
| 8        | Tumor           | 86          | 30          | 2.3     | Normal          | 90          | 27          | 2.2     | Non-BCR    |
| 9        | Tumor           | 82          | 25          | 2.3     | Normal          | 85          | 26          | 2.3     | Non-BCR    |
| 10       | Tumor           | 85          | 24          | 2.2     | Normal          | 90          | 29          | 2.1     | BCR        |
| 11       | Tumor           | 82          | 25          | 2.3     | Normal          | 84          | 24          | 2.3     | Non-BCR    |
| 12       | Tumor           | 80          | 20          | 2.3     | Normal          | 82          | 20          | 2.3     | Non-BCR    |
| 13       | Tumor           | 86          | 19          | 2.4     | Normal          | 87          | 20          | 2.3     | BCR        |
| 14       | Tumor           | 82          | 23          | 2.4     | Normal          | 83          | 22          | 2.3     | Non-BCR    |
| 15       | Tumor           | 83          | 21          | 2.4     | Normal          | 82          | 22          | 2.3     | Non-BCR    |
| 16       | Tumor           | 89          | 38          | 2.1     | Normal          | 91          | 39          | 2.1     | BCR        |
| 17       | Tumor           | 87          | 26          | 2.2     | Normal          | 87          | 26          | 2.3     | Non-BCR    |
| 18       | Tumor           | 82          | 20          | 2.4     | Normal          | 90          | 33          | 2.1     | Non-BCR    |
| 19       | Tumor           | 89          | 33          | 2.1     | Normal          | 89          | 32          | 2.2     | BCR        |
| 20       | Tumor           | 79          | 33          | 2.3     | Normal          | 80          | 19          | 2.4     | Non-BCR    |
| 21       | Tumor           | 80          | 16          | 2.4     | Normal          | 81          | 18          | 2.4     | Non-BCR    |
| 22       | Tumor           | 88          | 31          | 2.2     | Normal          | 89          | 28          | 2.2     | BCR        |
| 23       | Tumor           | 89          | 40          | 2.3     | Normal          | 90          | 38          | 2.2     | Non-BCR    |
| 24       | Tumor           | 81          | 26          | 2.3     | Normal          | 85          | 28          | 2.2     | Non-BCR    |
| 25       | Tumor           | 88          | 38          | 2.2     | Normal          | 90          | 37          | 2.2     | BCR        |
| 26       | Tumor           | 76          | 17          | 2.3     | Normal          | 81          | 14          | 2.4     | Non-BCR    |
| 27       | Tumor           | 85          | 27          | 2.3     | Normal          | 88          | 33          | 2.2     | Non-BCR    |
| 28       | Tumor           | 87          | 35          | 2.3     | Normal          | 92          | 43          | 2       | BCR        |
| 29       | Tumor           | 77          | 16          | 2.4     | Normal          | 81          | 21          | 2.3     | Non-BCR    |
| 30       | Tumor           | 85          | 22          | 2.3     | Normal          | 82          | 28          | 2.3     | Non-BCR    |
| 31       | Tumor           | 87          | 34          | 2.4     | Normal          | 89          | 27          | 2.4     | BCR        |
| 32       | Tumor           | 84          | 26          | 2.4     | Normal          | 88          | 33          | 2.3     | Non-BCR    |
| 33       | Tumor           | 86          | 27          | 2.2     | Normal          | 92          | 35          | 2.2     | Non-BCR    |
| 34       | Tumor           | 91          | 35          | 2.2     | Normal          | 90          | 27          | 2.4     | BCR        |
| 35       | Tumor           | 89          | 29          | 2.2     | Normal          | 96          | 41          | 2       | Non-BCR    |
| 36       | Tumor           | 92          | 40          | 2.1     | Normal          | 88          | 37          | 2.1     | Non-BCR    |
| 37       | Tumor           | 88          | 38          | 2.1     | Normal          | 92          | 44          | 2.2     | BCR        |
| 38       | Tumor           | 88          | 35          | 2.2     | Normal          | 89          | 38          | 2.2     | Non-BCR    |
| 39       | Tumor           | 89          | 35          | 2.3     | Normal          | 83          | 36          | 2.3     | Non-BCR    |
| 40       | Tumor           | 92          | 43          | 2.1     | Normal          | 91          | 40          | 2.2     | BCR        |
| 41       | Tumor           | 92          | 42          | 2.1     | Normal          | 93          | 42          | 2.1     | Non-BCR    |
| 42       | Tumor           | 87          | 33          | 2.3     | Normal          | 89          | 25          | 2.3     | Non-BCR    |
| 43       | Tumor           | 91          | 35          | 2.2     | Normal          | 92          | 33          | 2.2     | BCR        |
| 44       | Tumor           | 86          | 29          | 2.3     | Normal          | 87          | 31          | 2.2     | Non-BCR    |
| 45       | Tumor           | 89          | 32          | 2.2     | Normal          | 88          | 31          | 2.3     | Non-BCR    |
| 46       | Tumor           | 92          | 32          | 2.2     | Normal          | 89          | 34          | 2.2     | BCR        |

|                |       |             |             |            |                |             |             |            |         |
|----------------|-------|-------------|-------------|------------|----------------|-------------|-------------|------------|---------|
| 47             | Tumor | 89          | 30          | 2.4        | Normal         | 92          | 28          | 2.4        | Non-BCR |
| 48             | Tumor | 88          | 32          | 2.4        | Normal         | 91          | 40          | 2.3        | Non-BCR |
| 49             | Tumor | 81          | 29          | 2.2        | Normal         | 91          | 26          | 2.3        | BCR     |
| 50             | Tumor | 90          | 33          | 2.2        | Normal         | 70          | 34          | 2.4        | Non-BCR |
| 51             | Tumor | 87          | 30          | 2.4        | Normal         | 85          | 20          | 2.4        | Non-BCR |
| 52             | Tumor | 76          | 14          | 2.4        | Normal         | 80          | 17          | 2.4        | BCR     |
| 53             | Tumor | 72          | 5           | 2.6        | Normal         | 78          | 17          | 2.4        | Non-BCR |
| 54             | Tumor | 82          | 22          | 2.3        | Normal         | 73          | 11          | 2.5        | Non-BCR |
| 55             | Tumor | 75          | 14          | 2.5        | Normal         | 75          | 12          | 2.4        | BCR     |
| 56             | Tumor | 84          | 22          | 2.3        | Normal         | 83          | 25          | 2.3        | Non-BCR |
| 57             | Tumor | 87          | 19          | 2.3        | Normal         | 89          | 21          | 2.3        | Non-BCR |
| 58             | Tumor | 89          | 29          | 2.2        | Normal         | 91          | 29          | 2.2        | BCR     |
| 59             | Tumor | 82          | 15          | 2.4        | Normal         | 80          | 13          | 2.4        | Non-BCR |
| 60             | Tumor | 86          | 14          | 2.2        | Normal         | 89          | 31          | 2.2        | Non-BCR |
| 61             | Tumor | 87          | 33          | 2.2        | Normal         | 86          | 29          | 2.4        | BCR     |
| 62             | Tumor | 90          | 29          | 2.3        | Normal         | 76          | 46          | 2.3        | Non-BCR |
| 63             | Tumor | 87          | 29          | 2.4        | Normal         | 89          | 39          | 2.3        | Non-BCR |
| <b>Average</b> |       | <b>85.2</b> | <b>27.0</b> | <b>2.3</b> | <b>Average</b> | <b>85.8</b> | <b>28.3</b> | <b>2.3</b> |         |

**Supplementary Table 2: Sequence-specific probes designed for NanoString assay. See Supplementary Table 2**

**Supplementary Table 3: Comparison of ERG detection by NanoString, IHC and QRT-PCR methods in prostatectomy specimens**

| No | BCR     | NanoString |                 |      | IHC         |                          | QRT-PCR                |        |  |
|----|---------|------------|-----------------|------|-------------|--------------------------|------------------------|--------|--|
|    |         | Pan ERG    | ERG1/ ERG2/ERG3 | ERG8 | Index tumor | GAPDH (Ct <sub>1</sub> ) | ERG (Ct <sub>2</sub> ) | ERG(+) |  |
| 1  | BCR     | 0          | 0               | 0    | 0           | 30.9                     | No Ct                  | 0      |  |
| 2  | BCR     | 0          | 0               | 0    | 0           | 31.1                     | No Ct                  | 0      |  |
| 3  | BCR     | 17         | 39              | 77   | 0           | 34.4                     | 44                     | 1      |  |
| 4  | BCR     | 308        | 223             | 351  | 1           | 27                       | 34.1                   | 1      |  |
| 5  | BCR     | 0          | 0               | 0    | 0           | 30.8                     | 45                     | 0      |  |
| 6  | BCR     | 30         | 7               | 12   | 0           | 32.1                     | No Ct                  | 0      |  |
| 7  | BCR     | 356        | 235             | 436  | 1           | 29.1                     | 37.1                   | 1      |  |
| 8  | BCR     | 5          | 0               | 0    | 0           | 30.6                     | No Ct                  | 0      |  |
| 9  | BCR     | 0          | 0               | 0    | 0           | 28.2                     | No Ct                  | 0      |  |
| 10 | BCR     | 352        | 278             | 474  | 1           | 27.7                     | No Ct                  | 0      |  |
| 11 | BCR     | 0          | 0               | 0    | 0           | 36.5                     | 32.6                   | 1      |  |
| 12 | BCR     | 0          | 0               | 0    | 0           | 28.7                     | No Ct                  | 0      |  |
| 13 | BCR     | 0          | 0               | 0    | 0           | 28.4                     | No Ct                  | 0      |  |
| 14 | BCR     | 0          | 0               | 0    | 0           | 29.9                     | No Ct                  | 0      |  |
| 15 | BCR     | 0          | 0               | 14   | 1           | 34.1                     | 47.3                   | 0      |  |
| 16 | BCR     | 48         | 11              | 55   | 1           | 27.8                     | No Ct                  | 0      |  |
| 17 | BCR     | 0          | 0               | 0    | 0           | 33.9                     | 47.4                   | 0      |  |
| 18 | BCR     | 232        | 102             | 258  | 1           | 32.3                     | 31.8                   | 1      |  |
| 19 | BCR     | 0          | 0               | 0    | 0           | 31                       | No Ct                  | 0      |  |
| 20 | BCR     | 2          | 0               | 0    | 0           | 29.1                     | 43.7                   | 1      |  |
| 21 | BCR     | 0          | 0               | 6    | 0           | 30.3                     | No Ct                  | 0      |  |
| 22 | Non-BCR | 11         | 0               | 9    | 0           | NA                       | NA                     | NA     |  |
| 23 | Non-BCR | 268        | 303             | 519  | 1           | NA                       | NA                     | NA     |  |
| 24 | Non-BCR | 0          | 0               | 0    | 0           | 23                       | No Ct                  | 0      |  |
| 25 | Non-BCR | 234        | 346             | 567  | 1           | 33.3                     | 46.4                   | 0      |  |
| 26 | Non-BCR | 118        | 51              | 181  | 1           | 31.3                     | 38.1                   | 1      |  |
| 27 | Non-BCR | 139        | 103             | 239  | 1           | 31.3                     | 43                     | 1      |  |
| 28 | Non-BCR | 0          | 0               | 0    | 0           | 31.6                     | No Ct                  | 0      |  |
| 29 | Non-BCR | 91         | 105             | 167  | 1           | 34.7                     | No Ct                  | 0      |  |
| 30 | Non-BCR | 340        | 325             | 683  | 1           | 32.5                     | 42.1                   | 1      |  |
| 31 | Non-BCR | 0          | 0               | 9    | 0           | 28.3                     | No Ct                  | 0      |  |
| 32 | Non-BCR | 158        | 203             | 421  | 1           | 31                       | No Ct                  | 0      |  |
| 33 | Non-BCR | 50         | 68              | 81   | 1           | 40.1                     | No Ct                  | NA     |  |
| 34 | Non-BCR | 622        | 408             | 830  | 1           | 31.5                     | No Ct                  | 0      |  |
| 35 | Non-BCR | 155        | 248             | 470  | 1           | NA                       | NA                     | NA     |  |

|    |         |     |     |      |   |      |       |    |
|----|---------|-----|-----|------|---|------|-------|----|
| 36 | Non-BCR | 331 | 159 | 322  | 1 | 27   | 30.4  | 1  |
| 37 | Non-BCR | 566 | 412 | 774  | 1 | NA   | NA    | NA |
| 38 | Non-BCR | 580 | 781 | 1098 | 0 | 34.5 | 37.6  | 1  |
| 39 | Non-BCR | 0   | 0   | 0    | 0 | 26.3 | No Ct | 0  |
| 40 | Non-BCR | 33  | 74  | 102  | 0 | NA   | NA    | NA |
| 41 | Non-BCR | 0   | 0   | 0    | 0 | 30.5 | 45.8  | 0  |
| 42 | Non-BCR | 4   | 0   | 0    | 0 | 34.2 | No Ct | 0  |
| 43 | Non-BCR | 338 | 208 | 401  | 1 | 34   | 41.9  | 1  |
| 44 | Non-BCR | 403 | 329 | 380  | 1 | 33.7 | 35.5  | 1  |
| 45 | Non-BCR | 179 | 85  | 213  | 1 | 34.9 | No Ct | 0  |
| 46 | Non-BCR | 463 | 216 | 653  | 1 | 27.4 | 33.1  | 1  |
| 47 | Non-BCR | 0   | 0   | 0    | 0 | 31.1 | No Ct | 0  |
| 48 | Non-BCR | 0   | 0   | 0    | 0 | 32.1 | 38.4  | 1  |
| 49 | Non-BCR | 0   | 0   | 0    | 0 | NA   | NA    | NA |
| 50 | Non-BCR | 90  | 130 | 194  | 0 | 30.5 | 40.4  | 1  |
| 51 | Non-BCR | 313 | 238 | 477  | 1 | 29.6 | 30    | 1  |
| 52 | Non-BCR | 452 | 583 | 812  | 1 | 37.9 | 30.3  | 1  |
| 53 | Non-BCR | 679 | 355 | 970  | 1 | 25.3 | 31.6  | 1  |
| 54 | Non-BCR | 373 | 268 | 630  | 1 | 30.4 | 38.5  | 1  |
| 55 | Non-BCR | 326 | 143 | 348  | 1 | 31.5 | 28.2  | 1  |
| 56 | Non-BCR | 503 | 290 | 479  | 1 | 29.8 | 38    | 1  |
| 57 | Non-BCR | 104 | 40  | 205  | 1 | 30.8 | No Ct | 0  |
| 58 | Non-BCR | 237 | 130 | 246  | 1 | 28.7 | 36.7  | 1  |
| 59 | Non-BCR | 0   | 0   | 0    | 0 | 28.6 | No Ct | 0  |
| 60 | Non-BCR | 229 | 146 | 290  | 1 | 30.7 | 49.1  | 0  |
| 61 | Non-BCR | 463 | 387 | 771  | 1 | 29   | 33.9  | 1  |
| 62 | Non-BCR | 103 | 99  | 169  | 1 | 31.7 | 44.4  | 1  |
| 63 | Non-BCR | 383 | 351 | 574  | 1 | 30.6 | 40.1  | 1  |

---
